# Supplementary material for: An Insight into the Structural Requirements and Pharmacophore Identification of Carbonic Anhydrase Inhibitors to Combat Oxidative Stress at High Altitudes: An In-Silico Approach
Source: MDPI journal article supplement (doi:10.3390/cimb44030068), 2022-02-23
Supplement: s1 [file s1]

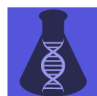

## Article

# An Insight into the Structural Requirements and Pharmacophore Identification of Carbonic Anhydrase Inhibitors to combat oxidative stress at High Altitudes: An *In-Silico* Approach

Amena Ali <sup>1,2,\*</sup>, Abuzer Ali <sup>3</sup>, Musarrat Husain Warsi <sup>4</sup>, Mohammad Akhlaquer Rahman <sup>4</sup>, Mohamed Jawed Ahsan <sup>5</sup> and Faizul Azam <sup>6</sup>

<sup>1</sup> High Altitude Research Center, Taif University, P.O. Box 11099, Taif 21944, Saudi Arabia; amrathore@tu.edu.sa

<sup>2</sup> Department of Pharmaceutical Chemistry, College of Pharmacy, Taif University, P.O. Box 11099, Taif 21944, Saudi Arabia; amrathore@tu.edu.sa

<sup>3</sup> Department of Pharmacognosy, College of Pharmacy, Taif University, P.O. Box 11099, Taif 21944, Saudi Arabia; abuali@tu.edu.sa

<sup>4</sup> Department of Pharmaceutics and Industrial Pharmacy, College of Pharmacy, Taif University, P.O. Box 11099, Taif 21944, Saudi Arabia; mvarsi@tu.edu.sa (M.H.W.); mrahman@tu.edu.sa ((M.A.R.))

<sup>5</sup> Department of Pharmaceutical Chemistry, Maharishi Arvind College of Pharmacy, Ambabari Circle, Jaipur, Rajasthan 302 039, India; jawedpharma@gmail.com

<sup>6</sup> Department of Pharmaceutical Chemistry & Pharmacognosy, Unaizah College of Pharmacy, Qassim University, P.O. Box 5888, Unaizah 51911, Saudi Arabia; f.azam@qu.edu.sa

\* Correspondence: amrathore@tu.edu.sa

**Table S1.** The pharmacophore study carried out for the dataset

| HypoID | Survival | Site   | Vector | Volume | Select | Matches | Inactive | Adjusted | BED-ROC | RefLig |
|--------|----------|--------|--------|--------|--------|---------|----------|----------|---------|--------|
| DDRR_1 | 5.4403   | 1      | 1      | 0.9301 | 1.9083 | 4       | 2.7979   | 2.6424   | 1       | mol_2  |
| DDRR_2 | 5.4403   | 1      | 1      | 0.9301 | 1.9083 | 4       | 2.7979   | 2.6424   | 1       | mol_2  |
| DDRR_3 | 5.4344   | 0.9999 | 1      | 0.9303 | 1.9021 | 4       | 2.8723   | 2.562    | 1       | mol_2  |
| DDRR_4 | 5.4336   | 1      | 1      | 0.9306 | 1.901  | 4       | 2.5881   | 2.8455   | 1       | mol_2  |
| DDRR_5 | 5.4233   | 1      | 1      | 0.9307 | 1.8906 | 4       | 2.5503   | 2.873    | 1       | mol_2  |
| ADRR_1 | 5.2355   | 1      | 1      | 0.93   | 1.7036 | 4       | 2.8242   | 2.4114   | 1       | mol_2  |
| ADRR_2 | 5.2177   | 1      | 1      | 0.9301 | 1.6857 | 4       | 2.898    | 2.3197   | 1       | mol_2  |
| ADRR_3 | 5.2028   | 1      | 1      | 0.8972 | 1.7036 | 4       | 2.7787   | 2.4241   | 1       | mol_5  |
| ADRR_4 | 5.1937   | 1      | 1      | 0.8979 | 1.6937 | 4       | 2.427    | 2.7667   | 1       | mol_5  |
| ADRR_5 | 5.1834   | 0.9999 | 1      | 0.9301 | 1.6513 | 4       | 2.8282   | 2.3553   | 1       | mol_2  |
| DDRR_1 | 4.9585   | 1      | 1      | 0.9301 | 1.4264 | 4       | 2.8214   | 2.137    | 1       | mol_2  |
| DDRR_2 | 4.9585   | 1      | 1      | 0.9301 | 1.4264 | 4       | 2.8214   | 2.137    | 1       | mol_2  |
| DDRR_3 | 4.9527   | 1      | 1      | 0.9303 | 1.4204 | 4       | 2.9038   | 2.0489   | 1       | mol_2  |
| DDRR_4 | 4.9489   | 1      | 1      | 0.9301 | 1.4168 | 4       | 2.7901   | 2.1588   | 1       | mol_2  |
| DDRR_5 | 4.9488   | 1      | 1      | 0.9306 | 1.4162 | 4       | 2.6459   | 2.3029   | 1       | mol_2  |
| DDRR_6 | 4.9475   | 1      | 1      | 0.9303 | 1.4153 | 4       | 2.8664   | 2.0812   | 1       | mol_2  |
| DDRR_7 | 4.9451   | 0.9999 | 1      | 0.9303 | 1.4129 | 4       | 2.8672   | 2.0779   | 1       | mol_2  |

|         |        |   |   |        |        |   |        |        |   |       |
|---------|--------|---|---|--------|--------|---|--------|--------|---|-------|
| DDRR_8  | 4.9444 | 1 | 1 | 0.9307 | 1.4117 | 4 | 2.6223 | 2.3221 | 1 | mol_2 |
| DDRR_9  | 4.9418 | 1 | 1 | 0.9306 | 1.4092 | 4 | 2.5853 | 2.3564 | 1 | mol_2 |
| DDRR_10 | 4.9388 | 1 | 1 | 0.9307 | 1.4061 | 4 | 2.5917 | 2.3471 | 1 | mol_2 |

**Table S2.** The HTVS docking study carried out for the ZINC compounds

| s_lp_Variant   | r_i_glide_energy | r_sd_rmsd | r_i_docking_score | r_i_glide_erotb | s_lp_Force_Field |
|----------------|------------------|-----------|-------------------|-----------------|------------------|
| ZINC70762033-1 | -38.59           | 0.57      | -5.01             | 0.55            | OPLS_2005        |
| ZINC70762031-2 | -38.59           | 0.64      | -5.01             | 0.55            | OPLS_2005        |
| ZINC40097700-1 | -38.59           | 0.67      | -4.99             | 0.77            | OPLS_2005        |
| ZINC90623072-2 | -38.69           | 0.56      | -4.99             | 0.93            | OPLS_2005        |
| ZINC40097521-1 | -22.73           | 0.54      | -4.89             | 0.64            | OPLS_2005        |
| ZINC77699643-2 | -38.11           | 0.55      | -4.87             | 0.78            | OPLS_2005        |
| ZINC40097670-2 | -36.94           | 0.57      | -4.87             | 0.64            | OPLS_2005        |
| ZINC77699643-1 | -38.71           | 0.55      | -4.84             | 0.78            | OPLS_2005        |
| ZINC89999382-1 | -37.95           | 0.60      | -4.81             | 0.71            | OPLS_2005        |
| ZINC71926558-1 | -30.90           | 0.59      | -4.81             | 0.90            | OPLS_2005        |
| ZINC72277793-1 | -32.99           | 0.33      | -4.79             | 1.06            | OPLS_2005        |
| ZINC93366947-1 | -36.89           | 0.30      | -4.73             | 0.68            | OPLS_2005        |
| ZINC90626422-1 | -35.75           | 0.51      | -4.73             | 0.95            | OPLS_2005        |
| ZINC90745935-2 | -35.87           | 0.62      | -4.71             | 0.77            | OPLS_2005        |
| ZINC83312205-2 | -35.82           | 0.53      | -4.71             | 0.81            | OPLS_2005        |
| ZINC78644559-3 | -34.19           | 0.69      | -4.67             | 0.72            | OPLS_2005        |
| ZINC90480109-1 | -38.89           | 0.58      | -4.66             | 0.80            | OPLS_2005        |
| ZINC77507712-2 | -37.88           | 0.56      | -4.66             | 0.99            | OPLS_2005        |
| ZINC70762033-2 | -39.05           | 0.57      | -4.62             | 0.55            | OPLS_2005        |
| ZINC70762031-1 | -39.05           | 0.64      | -4.62             | 0.55            | OPLS_2005        |
| ZINC75978306-1 | -26.05           | 0.54      | -4.59             | 0.59            | OPLS_2005        |
| ZINC56658160-2 | -37.12           | 0.59      | -4.56             | 1.10            | OPLS_2005        |

**Table S3.** The docking study carried out for dataset

| Molecule         | glide lig-num | glide rotatable bonds | docking score | glide ligand efficiency | glide ligand efficiency sa | glide ligand efficiency ln | glide gscore | glide lipo | glide hbond |
|------------------|---------------|-----------------------|---------------|-------------------------|----------------------------|----------------------------|--------------|------------|-------------|
| ZINC9209400<br>1 | 13            | 6                     | -5.217        | -0.248                  | -0.685                     | -1.29                      | -5.217       | -1.519     | -0.563      |
| ZINC9209400<br>1 | 15            | 5                     | -4.866        | -0.243                  | -0.66                      | -1.218                     | -4.866       | -1.361     | -0.596      |
| ZINC7227779<br>3 | 19            | 5                     | -4.729        | -0.236                  | -0.642                     | -1.183                     | -4.729       | -1.354     | -0.517      |

|                  |    |   |        |        |        |        |        |        |        |
|------------------|----|---|--------|--------|--------|--------|--------|--------|--------|
| ZINC7227779<br>3 | 16 | 6 | -4.641 | -0.232 | -0.63  | -1.161 | -4.641 | -0.965 | -0.32  |
| ZINC7227779<br>3 | 26 | 4 | -4.635 | -0.211 | -0.59  | -1.133 | -4.635 | -1.051 | -0.596 |
| ZINC7227779<br>3 | 27 | 5 | -4.571 | -0.19  | -0.549 | -1.094 | -4.571 | -1.039 | -0.135 |
| ZINC8958033<br>7 | 2  | 6 | -4.385 | -0.231 | -0.616 | -1.112 | -4.385 | -0.848 | -0.32  |
| ZINC8958033<br>7 | 7  | 5 | -4.309 | -0.227 | -0.605 | -1.093 | -4.309 | -1.071 | -0.166 |
| ZINC5524547<br>5 | 20 | 6 | -4.283 | -0.195 | -0.545 | -1.047 | -4.283 | -1.329 | 0      |
| ZINC4425408<br>2 | 18 | 5 | -4.24  | -0.212 | -0.575 | -1.061 | -4.24  | -1.093 | -0.32  |
| ZINC7750995<br>2 | 5  | 7 | -4.163 | -0.198 | -0.547 | -1.029 | -4.163 | -1.037 | 0      |
| ZINC7750995<br>2 | 1  | 5 | -4.115 | -0.229 | -0.599 | -1.058 | -4.115 | -0.968 | -0.099 |
| ZINC9162896<br>8 | 17 | 6 | -4.107 | -0.196 | -0.54  | -1.016 | -4.107 | -1.096 | -0.295 |
| ZINC9162896<br>8 | 25 | 4 | -4.09  | -0.195 | -0.537 | -1.011 | -4.09  | -0.689 | -0.111 |
| ZINC2110170<br>2 | 23 | 5 | -4.069 | -0.239 | -0.615 | -1.061 | -4.069 | -0.771 | -0.179 |
| ZINC2110170<br>2 | 12 | 6 | -4.058 | -0.193 | -0.533 | -1.003 | -4.058 | -0.967 | -0.179 |
| ZINC9206802<br>5 | 6  | 5 | -4.044 | -0.213 | -0.568 | -1.025 | -4.044 | -0.851 | -0.08  |
| ZINC9206802<br>5 | 10 | 5 | -3.919 | -0.206 | -0.55  | -0.994 | -3.919 | -0.681 | -0.08  |
| ZINC4009776<br>0 | 21 | 6 | -3.813 | -0.159 | -0.458 | -0.913 | -3.813 | -1.686 | -0.247 |
| ZINC4009776<br>0 | 11 | 6 | -3.778 | -0.18  | -0.496 | -0.934 | -3.778 | -0.885 | -0.006 |
| ZINC8111046<br>9 | 9  | 5 | -3.699 | -0.195 | -0.519 | -0.938 | -3.699 | -0.899 | -0.131 |
| ZINC8111046<br>9 | 8  | 5 | -3.693 | -0.194 | -0.519 | -0.936 | -3.693 | -0.842 | 0      |
| ZINC4008641<br>4 | 3  | 6 | -3.608 | -0.18  | -0.49  | -0.903 | -3.608 | -0.772 | 0      |

|                  |    |   |        |        |        |        |        |        |   |
|------------------|----|---|--------|--------|--------|--------|--------|--------|---|
| ZINC4008641<br>4 | 4  | 6 | -3.524 | -0.176 | -0.478 | -0.882 | -3.524 | -0.898 | 0 |
| ZINC4364444<br>6 | 22 | 5 | -3.48  | -0.193 | -0.507 | -0.895 | -3.48  | -0.439 | 0 |
| ZINC4364444<br>6 | 14 | 5 | -3.464 | -0.182 | -0.486 | -0.878 | -3.464 | -0.714 | 0 |
| ZINC9205676<br>6 | 24 | 6 | -3.297 | -0.206 | -0.519 | -0.874 | -3.297 | -0.884 | 0 |

**Table S4.** The QIKPROP study carried out ZINC database

| Molecule     | mol_MW  | Di-pole | SASA    | FOSA    | FISA    | PISA    | do-norHB | ac-ceptHB | dip <sup>2</sup> /V | QPP-Caco |
|--------------|---------|---------|---------|---------|---------|---------|----------|-----------|---------------------|----------|
| ZINC78402745 | 272.321 | 7.175   | 580.523 | 155.686 | 65.598  | 320.63  | 2        | 2         | 0.053596            | 1640.57  |
| ZINC92094001 | 287.364 | 4.83    | 591.116 | 306.052 | 95.369  | 189.696 | 2        | 4.5       | 0.022991            | 833.33   |
| ZINC92094001 | 287.364 | 5.105   | 590.675 | 305.907 | 93.174  | 191.594 | 2        | 4.5       | 0.025696            | 890.54   |
| ZINC72277793 | 293.297 | 3.904   | 538.26  | 202.226 | 126.233 | 162.772 | 3        | 5.2       | 0.016262            | 517.41   |
| ZINC72277793 | 293.297 | 4.073   | 566.3   | 189.468 | 141.532 | 188.277 | 3        | 5.2       | 0.01739             | 306.95   |
| ZINC72277793 | 293.297 | 10.466  | 571.968 | 189.517 | 133.627 | 201.802 | 3        | 5.2       | 0.114168            | 340.75   |
| ZINC72277793 | 293.297 | 8.899   | 555.374 | 202.292 | 119.3   | 186.753 | 3        | 5.2       | 0.083651            | 525.21   |
| ZINC89580337 | 293.322 | 9.944   | 573.624 | 366.293 | 118.816 | 88.516  | 3        | 4.75      | 0.101383            | 507.02   |
| ZINC89580337 | 293.322 | 9.946   | 570.807 | 362.897 | 118.685 | 89.225  | 3        | 4.75      | 0.101747            | 506.33   |
| ZINC55245475 | 293.386 | 4.67    | 590.565 | 325.785 | 85.886  | 147.65  | 2        | 4.5       | 0.021758            | 1016.70  |
| ZINC44254082 | 294.276 | 7.254   | 568.857 | 71.264  | 65.54   | 291.176 | 2        | 2         | 0.056247            | 1644.59  |
| ZINC77509952 | 297.261 | 7.116   | 554.313 | 136.457 | 152.07  | 204.251 | 3        | 5.2       | 0.055255            | 250.40   |
| ZINC77509952 | 297.261 | 7.215   | 554.927 | 136.924 | 151.727 | 204.306 | 3        | 5.2       | 0.056776            | 251.03   |
| ZINC91628968 | 299.372 | 6.051   | 596.206 | 292.279 | 115.407 | 188.521 | 2        | 3.5       | 0.035731            | 502.38   |
| ZINC91628968 | 299.372 | 5.343   | 589.171 | 290.332 | 110.532 | 188.308 | 2        | 3.5       | 0.028085            | 580.75   |
| ZINC21101702 | 300.332 | 8.422   | 591.71  | 188.821 | 61.815  | 302.605 | 2        | 2.75      | 0.071769            | 1627.73  |
| ZINC21101702 | 300.332 | 8.422   | 591.71  | 188.821 | 61.815  | 302.605 | 2        | 2.75      | 0.071769            | 1627.73  |

|              |         |       |         |         |         |         |   |      |          |         |
|--------------|---------|-------|---------|---------|---------|---------|---|------|----------|---------|
| ZINC92068025 | 301.391 | 5.482 | 583.937 | 324.874 | 81.134  | 177.929 | 2 | 5    | 0.028706 | 1328.99 |
| ZINC92068025 | 301.391 | 5.305 | 594.398 | 324.891 | 84.632  | 184.875 | 2 | 5    | 0.02673  | 1260.46 |
| ZINC40097760 | 302.348 | 5.532 | 615.354 | 220.952 | 100.313 | 263.367 | 3 | 3.7  | 0.029607 | 828.79  |
| ZINC40097760 | 302.348 | 5.539 | 617.893 | 221.696 | 96.29   | 263.508 | 3 | 3.7  | 0.029636 | 830.40  |
| ZINC81110469 | 302.348 | 4.754 | 604.316 | 201.976 | 49.765  | 314.343 | 2 | 3.7  | 0.021957 | 2343.25 |
| ZINC81110469 | 302.348 | 4.574 | 609.242 | 200.564 | 53.838  | 316.603 | 2 | 3.7  | 0.020283 | 2028.26 |
| ZINC40086414 | 304.32  | 4.789 | 518.766 | 120.785 | 97.622  | 268.989 | 3 | 4.45 | 0.024657 | 877.04  |
| ZINC40086414 | 304.32  | 7.597 | 572.894 | 144.074 | 97.515  | 310.546 | 3 | 4.45 | 0.059241 | 841.60  |
| ZINC43644446 | 304.348 | 6.495 | 625.056 | 278.317 | 119.222 | 227.516 | 3 | 5.95 | 0.040361 | 511.12  |
| ZINC43644446 | 304.348 | 8.672 | 564.107 | 265.354 | 114.365 | 184.389 | 3 | 5.95 | 0.075218 | 625.79  |
| ZINC92056766 | 304.409 | 4.569 | 607.654 | 275.15  | 100.97  | 187.736 | 2 | 5    | 0.020125 | 735.12  |
| ZINC92056766 | 304.409 | 4.826 | 607.852 | 274.837 | 99.128  | 190.063 | 2 | 5    | 0.022462 | 777.75  |
| ZINC75407574 | 303.421 | 5.403 | 596.595 | 262.52  | 52.038  | 233.642 | 2 | 4    | 0.028138 | 604.02  |
| ZINC75407574 | 303.421 | 5.432 | 600.324 | 261.657 | 52.218  | 238.065 | 2 | 4    | 0.028387 | 599.55  |
| ZINC75407574 | 303.421 | 5.544 | 595.514 | 260.302 | 52.191  | 234.639 | 2 | 4    | 0.029749 | 600.09  |
| ZINC75407574 | 303.421 | 4.985 | 608.393 | 256.615 | 56.483  | 246.897 | 2 | 4    | 0.023875 | 517.96  |
| ZINC77507712 | 304.775 | 5.885 | 589.344 | 133.209 | 93.958  | 315.159 | 3 | 3.7  | 0.034936 | 1035.03 |
| ZINC77507712 | 304.775 | 5.459 | 598.276 | 131.154 | 95.212  | 314.76  | 3 | 3.7  | 0.029814 | 848.36  |
| ZINC81110527 | 306.311 | 6.165 | 580.926 | 122.761 | 89.547  | 300.247 | 3 | 3.7  | 0.038768 | 1055.77 |
| ZINC81110527 | 306.311 | 6.165 | 580.926 | 122.761 | 89.547  | 300.247 | 3 | 3.7  | 0.03877  | 1055.77 |
| ZINC93277934 | 306.367 | 7.037 | 612.384 | 351.172 | 139.771 | 121.441 | 3 | 6.2  | 0.046957 | 336.53  |
| ZINC93277934 | 306.367 | 7.075 | 603.977 | 356.903 | 127.48  | 119.594 | 3 | 6.2  | 0.047651 | 452.93  |
| ZINC89475098 | 306.425 | 5.443 | 571.646 | 375.813 | 40.554  | 112.441 | 2 | 3    | 0.028797 | 3213.42 |
| ZINC89475098 | 306.425 | 9.004 | 572.672 | 372.264 | 46.195  | 117.391 | 2 | 3    | 0.079221 | 2772.39 |
| ZINC81110404 | 308.303 | 5.14  | 565.447 | 153.531 | 50.097  | 237.777 | 2 | 2    | 0.027375 | 2235.82 |
| ZINC75540557 | 309.315 | 6.066 | 587.621 | 278.559 | 77.704  | 146.932 | 2 | 4    | 0.037027 | 1204.67 |

|              |         |        |         |         |         |         |   |      |          |         |
|--------------|---------|--------|---------|---------|---------|---------|---|------|----------|---------|
| ZINC75540557 | 309.315 | 7.136  | 581.435 | 294.615 | 72.946  | 139.343 | 2 | 4    | 0.051457 | 1350.40 |
| ZINC75540557 | 309.315 | 4.172  | 580.106 | 294.709 | 78.56   | 126.08  | 2 | 4    | 0.017527 | 1325.14 |
| ZINC75540557 | 309.315 | 4.964  | 591.733 | 289.711 | 84.752  | 141.638 | 2 | 4    | 0.024603 | 1025.53 |
| ZINC77180771 | 310.395 | 4.554  | 593.829 | 300.092 | 80.432  | 213.306 | 3 | 2.75 | 0.019592 | 1231.30 |
| ZINC77180771 | 310.395 | 6.314  | 618.395 | 302.526 | 75.319  | 240.55  | 3 | 2.75 | 0.037205 | 1333.93 |
| ZINC79818756 | 311.383 | 6.261  | 594.481 | 241.083 | 107.135 | 246.263 | 3 | 4.25 | 0.037671 | 656.08  |
| ZINC79818756 | 311.383 | 3.51   | 571.943 | 241.415 | 97.931  | 232.596 | 3 | 4.25 | 0.012066 | 965.85  |
| ZINC38548906 | 312.33  | 11.95  | 625.981 | 165.426 | 146.685 | 313.87  | 2 | 6    | 0.137323 | 264.70  |
| ZINC38548906 | 312.33  | 12.128 | 636.258 | 169.503 | 151.75  | 315.005 | 2 | 6    | 0.140454 | 218.92  |
| ZINC21102218 | 312.368 | 6.002  | 622.205 | 284.864 | 61.814  | 275.527 | 2 | 3.5  | 0.03431  | 1629.34 |
| ZINC21102218 | 312.368 | 6.002  | 622.205 | 284.864 | 61.814  | 275.527 | 2 | 3.5  | 0.03431  | 1629.34 |
| ZINC90626422 | 312.368 | 4.922  | 599.173 | 204.074 | 80.101  | 314.998 | 3 | 3.5  | 0.02359  | 1196.24 |
| ZINC90626422 | 312.368 | 6.303  | 567.267 | 207.382 | 76.851  | 283.034 | 3 | 3.5  | 0.039397 | 1525.22 |
| ZINC56347457 | 311.426 | 5.727  | 651.318 | 295.77  | 29.396  | 326.153 | 2 | 4    | 0.028825 | 1032.29 |
| ZINC56347457 | 311.426 | 5.204  | 656.404 | 294.559 | 29.208  | 332.636 | 2 | 4    | 0.023747 | 1045.78 |
| ZINC75409812 | 314.364 | 5.966  | 600.371 | 120.502 | 126.473 | 305.01  | 2 | 5.5  | 0.035536 | 394.13  |
| ZINC93276497 | 314.386 | 3.647  | 620.248 | 300.049 | 73.663  | 246.536 | 2 | 3.75 | 0.012492 | 1361.33 |
| ZINC93276497 | 314.386 | 4.587  | 623.224 | 301.85  | 74.587  | 246.786 | 2 | 3.75 | 0.019722 | 1326.13 |
| ZINC78489532 | 314.386 | 5.308  | 657.454 | 235.413 | 115.411 | 306.63  | 3 | 5.2  | 0.025448 | 544.01  |
| ZINC78489532 | 314.386 | 5.64   | 668.065 | 241.184 | 120.165 | 306.716 | 3 | 5.2  | 0.028496 | 454.00  |
| ZINC78489532 | 314.386 | 5.165  | 658.326 | 235.102 | 116.849 | 306.375 | 3 | 5.2  | 0.024084 | 526.09  |
| ZINC78489532 | 314.386 | 2.773  | 658.017 | 234.479 | 117.57  | 305.968 | 3 | 5.2  | 0.006947 | 512.34  |
| ZINC90623072 | 316.374 | 6.797  | 603.915 | 129.269 | 83.898  | 343.711 | 3 | 3.7  | 0.043981 | 1107.98 |
| ZINC90623072 | 316.374 | 7.22   | 594.179 | 125.744 | 78.964  | 342.437 | 3 | 3.7  | 0.049963 | 1252.89 |
| ZINC93263339 | 316.377 | 4.51   | 645.142 | 300.822 | 77.891  | 238.697 | 2 | 3    | 0.018612 | 1197.65 |
| ZINC93263339 | 316.377 | 5.408  | 631.607 | 304.863 | 67.273  | 231.181 | 2 | 3    | 0.027018 | 1456.86 |

|              |         |       |         |         |         |         |     |      |          |         |
|--------------|---------|-------|---------|---------|---------|---------|-----|------|----------|---------|
| ZINC93263339 | 316.377 | 3.386 | 632.899 | 303.599 | 67.761  | 228.413 | 2   | 3    | 0.010596 | 1437.61 |
| ZINC93263339 | 316.377 | 4.459 | 645.465 | 301.738 | 77.519  | 238.331 | 2   | 3    | 0.018181 | 1226.53 |
| ZINC43343865 | 316.42  | 8.984 | 616.862 | 295.435 | 103.167 | 171.39  | 2   | 4    | 0.0767   | 734.82  |
| ZINC43343865 | 316.42  | 8.944 | 615.672 | 295.239 | 102.176 | 171.448 | 2   | 4    | 0.076078 | 759.01  |
| ZINC05334030 | 316.789 | 5.913 | 645.537 | 177.441 | 90.128  | 306.37  | 2   | 3    | 0.032792 | 826.30  |
| ZINC48450727 | 317.362 | 8.213 | 630.934 | 218.838 | 65.521  | 298.269 | 2   | 3.75 | 0.063376 | 1684.30 |
| ZINC56658160 | 318.347 | 10.08 | 592.192 | 218.907 | 93.331  | 231.645 | 3   | 3.5  | 0.098496 | 941.61  |
| ZINC56658160 | 318.347 | 7.936 | 594.554 | 218.844 | 93.49   | 233.899 | 3   | 3.5  | 0.060962 | 940.07  |
| ZINC89275054 | 319.335 | 8.45  | 591.117 | 191.448 | 152.09  | 200.538 | 4   | 5.25 | 0.070189 | 253.61  |
| ZINC89275054 | 319.335 | 8.45  | 591.12  | 191.449 | 152.091 | 200.539 | 4   | 5.25 | 0.070192 | 253.60  |
| ZINC38935475 | 320.406 | 7.617 | 591.847 | 305.844 | 40.869  | 210.675 | 2   | 3.5  | 0.055782 | 3065.18 |
| ZINC38935475 | 320.406 | 7.485 | 606.053 | 312.068 | 36.709  | 221.079 | 2   | 3.5  | 0.053568 | 3481.29 |
| ZINC48290987 | 321.332 | 9.577 | 577.347 | 302.759 | 135.635 | 138.953 | 3   | 6.7  | 0.09093  | 348.23  |
| ZINC48290987 | 321.332 | 9.698 | 578.826 | 300.96  | 138.824 | 139.042 | 3   | 6.7  | 0.093369 | 322.50  |
| ZINC58299473 | 322.409 | 6.947 | 651.426 | 247.912 | 75.175  | 328.338 | 2   | 3    | 0.042843 | 1364.53 |
| ZINC58299473 | 322.409 | 7.005 | 656.179 | 247.416 | 76.371  | 332.393 | 2   | 3    | 0.043452 | 1275.32 |
| ZINC71926558 | 322.766 | 5.734 | 582.383 | 89.388  | 93.112  | 286.715 | 3   | 3.7  | 0.032769 | 944.47  |
| ZINC71926558 | 322.766 | 5.734 | 582.9   | 89.388  | 93.109  | 287.236 | 3   | 3.7  | 0.032765 | 944.52  |
| ZINC78644559 | 322.766 | 5.583 | 566.524 | 106.546 | 69.75   | 272.085 | 3   | 3.7  | 0.031426 | 1650.07 |
| ZINC78644559 | 322.766 | 9.147 | 571.204 | 102.378 | 77.344  | 273.223 | 3   | 3.7  | 0.084064 | 1304.48 |
| ZINC78644559 | 322.766 | 9.134 | 577.597 | 102.237 | 73.097  | 283.752 | 3   | 3.7  | 0.083429 | 1516.29 |
| ZINC78644559 | 322.766 | 5.584 | 565.932 | 106.566 | 69.731  | 271.512 | 3   | 3.7  | 0.03143  | 1650.51 |
| ZINC54008775 | 323.317 | 4.444 | 595.598 | 125.364 | 58.453  | 285.777 | 2   | 3    | 0.019521 | 1874.13 |
| ZINC89223521 | 323.384 | 7.006 | 607.357 | 237.513 | 103.616 | 175.512 | 3   | 4.25 | 0.047352 | 733.60  |
| ZINC89223521 | 323.384 | 6.921 | 593.807 | 238.183 | 95.881  | 168.964 | 3   | 4.25 | 0.046617 | 869.75  |
| ZINC06276737 | 324.209 | 6.989 | 564.53  | 79.98   | 87.108  | 267.798 | 3.5 | 3    | 0.050451 | 1195.41 |

|              |         |       |         |         |         |         |   |      |          |         |
|--------------|---------|-------|---------|---------|---------|---------|---|------|----------|---------|
| ZINC90475747 | 324.302 | 4.697 | 564.552 | 104.447 | 80.359  | 240.845 | 3 | 2.75 | 0.022529 | 1239.93 |
| ZINC90475747 | 324.302 | 3.84  | 590.145 | 106.318 | 78.099  | 266.549 | 3 | 2.75 | 0.014817 | 1265.55 |
| ZINC89999382 | 324.302 | 8.822 | 573.136 | 106.336 | 72.495  | 258.514 | 3 | 2.75 | 0.078874 | 1432.61 |
| ZINC89999382 | 324.302 | 8.821 | 573.139 | 106.336 | 72.497  | 258.516 | 3 | 2.75 | 0.078868 | 1432.53 |
| ZINC40525732 | 324.302 | 9.971 | 569.621 | 142.464 | 91.528  | 220.188 | 3 | 3.7  | 0.100739 | 970.05  |
| ZINC40525732 | 324.302 | 5.077 | 612.299 | 133.822 | 105.464 | 239.019 | 3 | 3.7  | 0.025392 | 723.61  |
| ZINC93370074 | 325.369 | 5.805 | 641.304 | 221.479 | 194.406 | 225.419 | 4 | 5.7  | 0.031113 | 101.98  |
| ZINC93370074 | 325.369 | 8.596 | 641.731 | 224.452 | 188.714 | 228.565 | 4 | 5.7  | 0.068287 | 110.95  |
| ZINC93370074 | 325.369 | 4.901 | 638.498 | 224.055 | 190.312 | 224.132 | 4 | 5.7  | 0.022267 | 107.60  |
| ZINC93370074 | 325.369 | 4.416 | 636.53  | 221.025 | 195.485 | 220.02  | 4 | 5.7  | 0.018085 | 101.88  |
| ZINC21101973 | 326.394 | 6.331 | 652.44  | 327.145 | 61.76   | 263.535 | 2 | 3.5  | 0.036164 | 1633.75 |
| ZINC21101973 | 326.394 | 6.249 | 652.631 | 327.164 | 61.816  | 263.651 | 2 | 3.5  | 0.035229 | 1628.62 |
| ZINC40088332 | 326.73  | 8.368 | 583.888 | 44.864  | 100.067 | 289.73  | 3 | 3.7  | 0.071921 | 833.91  |
| ZINC40088332 | 326.73  | 5.684 | 584.02  | 44.912  | 100.031 | 289.767 | 3 | 3.7  | 0.033173 | 834.96  |
| ZINC85607974 | 327.339 | 2.43  | 584.918 | 104.323 | 140.873 | 339.722 | 3 | 4.75 | 0.005749 | 331.67  |
| ZINC85607974 | 327.339 | 3.513 | 610.114 | 106.756 | 132.127 | 371.231 | 3 | 4.75 | 0.011802 | 391.99  |
| ZINC89223120 | 327.357 | 1.253 | 598.093 | 183.359 | 132.55  | 235.24  | 3 | 4.25 | 0.001483 | 389.21  |
| ZINC89223120 | 327.357 | 4.706 | 567.575 | 186.725 | 103.793 | 236.728 | 3 | 4.25 | 0.021491 | 712.59  |
| ZINC58126702 | 327.425 | 5.078 | 674.541 | 330.414 | 61.516  | 282.611 | 2 | 4.7  | 0.022154 | 1805.55 |
| ZINC58126702 | 327.425 | 5.935 | 661.296 | 350.829 | 52.552  | 257.916 | 2 | 4.7  | 0.030498 | 2183.35 |
| ZINC58126702 | 327.425 | 4.756 | 680.123 | 344.502 | 61.502  | 274.119 | 2 | 4.7  | 0.019263 | 1797.91 |
| ZINC58126702 | 327.425 | 6.295 | 641.86  | 357.955 | 46.665  | 237.24  | 2 | 4.7  | 0.034519 | 2680.08 |
| ZINC77415252 | 328.367 | 6.012 | 627.68  | 289.416 | 61.819  | 276.445 | 2 | 4.25 | 0.033989 | 1631.05 |
| ZINC77415252 | 328.367 | 6.012 | 627.68  | 289.416 | 61.819  | 276.445 | 2 | 4.25 | 0.033989 | 1631.05 |
| ZINC76111420 | 328.388 | 7.861 | 568.578 | 132.898 | 93.331  | 309.567 | 2 | 4.5  | 0.061532 | 917.25  |
| ZINC76111420 | 328.388 | 3.411 | 598.196 | 128.948 | 103.017 | 329.7   | 2 | 4.5  | 0.01123  | 761.43  |



|              |         |        |         |         |         |         |   |      |          |         |
|--------------|---------|--------|---------|---------|---------|---------|---|------|----------|---------|
| ZINC04317497 | 328.757 | 7.809  | 594.317 | 34.435  | 164.651 | 323.631 | 3 | 4    | 0.061194 | 177.52  |
| ZINC84560114 | 329.373 | 10.268 | 619.661 | 50.465  | 141.89  | 371.479 | 3 | 5.2  | 0.101482 | 293.44  |
| ZINC84560114 | 329.373 | 10     | 594.402 | 58.758  | 129.169 | 354.454 | 3 | 5.2  | 0.097783 | 438.29  |
| ZINC77700472 | 327.428 | 6.51   | 671.099 | 325.55  | 63.629  | 281.92  | 2 | 5.5  | 0.036511 | 441.64  |
| ZINC77700472 | 327.428 | 6.684  | 653.074 | 330.442 | 55.74   | 266.892 | 2 | 5.5  | 0.038832 | 568.11  |
| ZINC77700472 | 327.428 | 3.991  | 668.731 | 324.902 | 64.958  | 278.87  | 2 | 5.5  | 0.013753 | 429.25  |
| ZINC77700472 | 327.428 | 4.857  | 677.076 | 324.154 | 71.235  | 281.687 | 2 | 5.5  | 0.02019  | 329.73  |
| ZINC77700472 | 327.428 | 4.404  | 650.137 | 328.564 | 57.243  | 264.33  | 2 | 5.5  | 0.016906 | 528.40  |
| ZINC77700472 | 327.428 | 7.254  | 673.941 | 323.503 | 68.294  | 282.144 | 2 | 5.5  | 0.045194 | 353.44  |
| ZINC77700472 | 327.428 | 7.109  | 651.593 | 327.898 | 59.226  | 264.469 | 2 | 5.5  | 0.044024 | 502.98  |
| ZINC77700472 | 327.428 | 7.456  | 669.669 | 322.976 | 69.762  | 276.931 | 2 | 5.5  | 0.047844 | 338.70  |
| ZINC40103376 | 329.785 | 10.439 | 636.307 | 133.895 | 170.676 | 267.187 | 3 | 5.2  | 0.101975 | 172.92  |
| ZINC40103376 | 329.785 | 13.449 | 637.782 | 136.826 | 165.103 | 271.308 | 3 | 5.2  | 0.169261 | 184.70  |
| ZINC77515036 | 330.17  | 5.456  | 567.09  | 130.563 | 156.254 | 179.175 | 3 | 5.2  | 0.031258 | 264.74  |
| ZINC77515036 | 330.17  | 7.7    | 570.061 | 130.502 | 146.256 | 192.091 | 3 | 5.2  | 0.061997 | 305.22  |
| ZINC77514919 | 330.17  | 6.995  | 571.11  | 132.818 | 144.749 | 192.446 | 3 | 5.2  | 0.051079 | 320.56  |
| ZINC77514919 | 330.17  | 7.005  | 571.219 | 132.736 | 144.7   | 192.559 | 3 | 5.2  | 0.051217 | 319.09  |
| ZINC78629022 | 330.404 | 9.727  | 614.03  | 221.3   | 142.009 | 206.887 | 3 | 6    | 0.089873 | 288.33  |
| ZINC78629022 | 330.404 | 9.589  | 619.93  | 220.761 | 148.338 | 207.069 | 3 | 6    | 0.087314 | 251.85  |
| ZINC70969481 | 330.813 | 5.844  | 614.514 | 159.497 | 62.281  | 321.136 | 3 | 2.75 | 0.031976 | 1774.23 |
| ZINC70969481 | 330.813 | 4.882  | 636.356 | 152.614 | 81.544  | 330.598 | 3 | 2.75 | 0.022022 | 1049.75 |
| ZINC78529937 | 331.321 | 2.562  | 564.257 | 99.048  | 108.439 | 278.159 | 3 | 4.5  | 0.006626 | 731.67  |
| ZINC78529937 | 331.321 | 3.971  | 576.885 | 93.059  | 119.167 | 278.097 | 3 | 4.5  | 0.0158   | 570.22  |
| ZINC93366947 | 332.364 | 7.518  | 632.842 | 124.185 | 165.177 | 343.479 | 3 | 5    | 0.052907 | 177.94  |
| ZINC93366947 | 332.364 | 7.965  | 626.029 | 132.298 | 158.291 | 335.441 | 3 | 5    | 0.059656 | 228.17  |
| ZINC93366947 | 332.364 | 5.548  | 628.941 | 123.584 | 166.857 | 338.501 | 3 | 5    | 0.028919 | 171.48  |

|              |         |        |         |         |         |         |   |      |          |         |
|--------------|---------|--------|---------|---------|---------|---------|---|------|----------|---------|
| ZINC56725163 | 332.374 | 5.279  | 639.855 | 264.866 | 94.628  | 234.86  | 3 | 3.5  | 0.025174 | 910.83  |
| ZINC56725163 | 332.374 | 7.955  | 636.116 | 265.476 | 93.445  | 231.809 | 3 | 3.5  | 0.057312 | 943.25  |
| ZINC90479962 | 332.374 | 6.653  | 603.011 | 272.969 | 77.448  | 214.091 | 3 | 4.45 | 0.041133 | 1299.89 |
| ZINC90479962 | 332.374 | 4.829  | 573.242 | 238.179 | 81.671  | 214.782 | 3 | 4.45 | 0.02231  | 1158.09 |
| ZINC90479962 | 332.374 | 4.83   | 572.663 | 238.224 | 81.679  | 214.147 | 3 | 4.45 | 0.022244 | 1157.80 |
| ZINC90479962 | 332.374 | 8.824  | 618.998 | 277.819 | 73.441  | 229.12  | 3 | 4.45 | 0.071532 | 1509.97 |
| ZINC77485048 | 334.392 | 9.222  | 626.312 | 328.451 | 113.09  | 137.842 | 2 | 5.5  | 0.080901 | 541.85  |
| ZINC77485048 | 334.392 | 9.268  | 626.432 | 328.601 | 113.259 | 137.882 | 2 | 5.5  | 0.081702 | 538.55  |
| ZINC76060829 | 334.42  | 8.055  | 647.263 | 173.975 | 67.351  | 405.937 | 2 | 3.5  | 0.056771 | 1705.24 |
| ZINC76060829 | 334.42  | 3.481  | 639.122 | 174.178 | 67.133  | 397.811 | 2 | 3.5  | 0.010568 | 1718.83 |
| ZINC75417669 | 334.432 | 8.336  | 671.563 | 313.145 | 98.137  | 227.525 | 3 | 4.45 | 0.061384 | 795.60  |
| ZINC75417669 | 334.432 | 4.165  | 670.964 | 311.488 | 103.334 | 223.457 | 3 | 4.45 | 0.015333 | 745.61  |
| ZINC79413526 | 334.432 | 6.709  | 669.013 | 353.896 | 45.532  | 230.582 | 2 | 3.5  | 0.039858 | 2468.41 |
| ZINC79413526 | 334.432 | 6.213  | 616.862 | 339.544 | 44.017  | 199.31  | 2 | 3.5  | 0.035382 | 2807.14 |
| ZINC75407592 | 333.448 | 4.249  | 649.669 | 351.058 | 56.463  | 193.698 | 2 | 4.75 | 0.016104 | 517.06  |
| ZINC75407592 | 333.448 | 7.142  | 661.452 | 351.138 | 64.421  | 197.524 | 2 | 4.75 | 0.045069 | 381.97  |
| ZINC75407592 | 333.448 | 5.255  | 618.41  | 349.575 | 49.705  | 196.012 | 2 | 4.75 | 0.025087 | 627.47  |
| ZINC75407592 | 333.448 | 7.076  | 662.775 | 347.716 | 65.079  | 201.524 | 2 | 4.75 | 0.044326 | 375.94  |
| ZINC90479277 | 335.377 | 2.884  | 636.748 | 291.034 | 130.462 | 168.207 | 3 | 4.25 | 0.00754  | 416.81  |
| ZINC90479277 | 335.377 | 3.166  | 641.68  | 302.791 | 137.297 | 154.553 | 3 | 4.25 | 0.009008 | 318.09  |
| ZINC89999987 | 336.408 | 12.024 | 650.12  | 314.022 | 148.993 | 140.189 | 3 | 6.45 | 0.131448 | 240.69  |
| ZINC89999987 | 336.408 | 3.186  | 623.318 | 330.785 | 138.616 | 126.868 | 3 | 6.45 | 0.009381 | 346.57  |
| ZINC89999987 | 336.408 | 8.884  | 634.95  | 331.495 | 131.666 | 125.215 | 3 | 6.45 | 0.072473 | 390.22  |
| ZINC89999987 | 336.408 | 6.958  | 634.805 | 334.436 | 124.208 | 129.333 | 3 | 6.45 | 0.044417 | 459.24  |
| ZINC89998740 | 336.793 | 6.218  | 589.709 | 177.203 | 72.827  | 230.462 | 3 | 2.75 | 0.037163 | 1431.51 |
| ZINC89998740 | 336.793 | 6.822  | 561.415 | 155.477 | 74.119  | 225.045 | 3 | 2.75 | 0.045874 | 1437.56 |

|              |         |        |         |         |         |         |      |      |          |         |
|--------------|---------|--------|---------|---------|---------|---------|------|------|----------|---------|
| ZINC93275037 | 336.82  | 9.446  | 647.261 | 249.735 | 111.715 | 214.16  | 3    | 4.7  | 0.080776 | 601.66  |
| ZINC93275037 | 336.82  | 8.295  | 644.509 | 245.597 | 117.681 | 209.579 | 3    | 4.7  | 0.062353 | 556.08  |
| ZINC79074099 | 338.329 | 5.97   | 651.614 | 248.761 | 64.228  | 204.64  | 2    | 2.75 | 0.032929 | 1822.09 |
| ZINC70763183 | 338.329 | 6.045  | 610.822 | 113.956 | 84.819  | 314.45  | 3    | 2    | 0.035098 | 992.18  |
| ZINC70763183 | 338.329 | 5.884  | 596.897 | 117.457 | 82.117  | 299.807 | 3    | 2    | 0.033482 | 1160.25 |
| ZINC72560748 | 338.368 | 3.171  | 630.968 | 104.35  | 129.33  | 397.288 | 3    | 5.75 | 0.009196 | 415.50  |
| ZINC72560748 | 338.368 | 2.759  | 644.983 | 99.743  | 139.887 | 405.353 | 3    | 5.75 | 0.0069   | 297.88  |
| ZINC32502283 | 337.377 | 12.438 | 608.766 | 197.11  | 104.799 | 306.857 | 2.25 | 4.75 | 0.144737 | 678.92  |
| ZINC75137076 | 338.399 | 10.261 | 629.006 | 275.401 | 120.196 | 138.656 | 3    | 5.7  | 0.097146 | 504.02  |
| ZINC75137076 | 338.399 | 10.693 | 649.552 | 257.937 | 143.017 | 153.886 | 3    | 5.7  | 0.104365 | 276.65  |
| ZINC75137076 | 338.399 | 11.008 | 646.974 | 256.335 | 151.203 | 153.761 | 3    | 5.7  | 0.110926 | 232.63  |
| ZINC75137076 | 338.399 | 10.253 | 629.258 | 275.441 | 119.884 | 139.224 | 3    | 5.7  | 0.096999 | 510.05  |
| ZINC43360170 | 338.426 | 3.928  | 633.04  | 234.112 | 107.824 | 261.957 | 2    | 4    | 0.014032 | 636.17  |
| ZINC43360170 | 338.426 | 9.732  | 643.575 | 233.816 | 103.864 | 261.607 | 2    | 4    | 0.085606 | 656.81  |
| ZINC40097662 | 338.765 | 10.095 | 625.157 | 142.202 | 95.23   | 277.875 | 3    | 4.45 | 0.097628 | 857.90  |
| ZINC40097662 | 338.765 | 11.693 | 624.787 | 141.276 | 95.28   | 278.491 | 3    | 4.45 | 0.131011 | 849.05  |
| ZINC75414890 | 339.18  | 2.812  | 615.735 | 44.446  | 147.443 | 286.563 | 1.5  | 4    | 0.007786 | 245.02  |
| ZINC91046473 | 339.753 | 7.9    | 581.683 | 227.318 | 109.822 | 136.999 | 2    | 5.2  | 0.062713 | 715.17  |
| ZINC91046473 | 339.753 | 7.695  | 579.358 | 234.253 | 107.023 | 130.942 | 2    | 5.2  | 0.059322 | 696.81  |
| ZINC91046473 | 339.753 | 7.707  | 578.994 | 234.835 | 106.831 | 130.022 | 2    | 5.2  | 0.059499 | 705.27  |
| ZINC91046473 | 339.753 | 6.835  | 583.992 | 227.224 | 109.249 | 137.676 | 2    | 5.2  | 0.046912 | 729.46  |
| ZINC44246717 | 340.359 | 13.24  | 649.88  | 143.314 | 159.135 | 300.41  | 2    | 5    | 0.158666 | 223.65  |
| ZINC66952522 | 340.421 | 5.497  | 669.024 | 320.401 | 92.902  | 255.721 | 3    | 3.5  | 0.026253 | 875.71  |
| ZINC66952522 | 340.421 | 8.218  | 631.619 | 332.988 | 71.999  | 226.632 | 3    | 3.5  | 0.059893 | 1425.85 |
| ZINC77702068 | 341.796 | 3.104  | 623.674 | 54.675  | 119.736 | 377.616 | 3    | 4.7  | 0.009053 | 509.78  |
| ZINC77702068 | 341.796 | 5.472  | 615.602 | 63.791  | 106.155 | 374.004 | 3    | 4.7  | 0.028237 | 701.76  |

**Table S5.** The ADME study carried out for database

| Molecule | mol_MW | dipole | SASA   | FOSA   | FISA   | PISA   | dip <sup>2</sup> /V | QPlogPw | QPlogPo/w |
|----------|--------|--------|--------|--------|--------|--------|---------------------|---------|-----------|
| 4a       | 279.33 | 8.68   | 534.30 | 21.33  | 154.66 | 229.93 | 0.09                | 14.50   | 1.33      |
| 4b       | 295.33 | 7.56   | 546.69 | 21.33  | 209.28 | 187.70 | 0.07                | 16.60   | 0.60      |
| 4c       | 309.36 | 7.39   | 571.89 | 114.51 | 154.61 | 174.39 | 0.06                | 14.73   | 1.45      |
| 4d       | 309.36 | 9.91   | 571.78 | 114.39 | 154.66 | 174.34 | 0.11                | 14.73   | 1.45      |
| 4e       | 325.36 | 8.61   | 584.39 | 114.47 | 205.92 | 135.62 | 0.08                | 16.83   | 0.75      |
| 4f       | 313.78 | 7.85   | 552.58 | 13.27  | 154.65 | 194.52 | 0.07                | 14.33   | 1.74      |
| 4g       | 313.78 | 7.34   | 558.26 | 21.33  | 154.66 | 182.38 | 0.06                | 14.26   | 1.81      |
| 4h       | 358.23 | 9.09   | 563.34 | 21.30  | 154.65 | 181.68 | 0.09                | 14.27   | 1.88      |
| 4i       | 358.23 | 7.46   | 563.30 | 21.34  | 154.66 | 181.65 | 0.06                | 14.27   | 1.88      |
| 4j       | 297.33 | 7.30   | 543.20 | 21.32  | 154.66 | 192.01 | 0.06                | 14.28   | 1.56      |
| 4k       | 324.33 | 7.09   | 571.82 | 12.43  | 246.24 | 184.77 | 0.05                | 15.67   | 0.71      |
| 4l       | 324.33 | 6.57   | 573.02 | 21.98  | 251.24 | 171.42 | 0.05                | 15.62   | 0.66      |
| 4m       | 322.40 | 8.93   | 610.12 | 156.37 | 154.64 | 170.73 | 0.08                | 15.05   | 1.81      |
| 4n       | 293.36 | 9.24   | 551.20 | 59.01  | 153.78 | 210.03 | 0.09                | 13.91   | 1.75      |
| 4o       | 307.39 | 9.63   | 582.56 | 146.70 | 153.78 | 153.71 | 0.10                | 13.60   | 2.04      |
| 4p       | 309.36 | 10.48  | 563.84 | 59.01  | 208.57 | 167.88 | 0.12                | 16.01   | 1.01      |
| 4q       | 323.39 | 10.50  | 585.36 | 162.54 | 143.92 | 150.52 | 0.11                | 14.04   | 1.91      |
| 4r       | 327.81 | 7.95   | 575.09 | 59.00  | 153.78 | 162.51 | 0.07                | 13.67   | 2.23      |
| 4s       | 372.26 | 8.07   | 580.13 | 59.00  | 153.78 | 161.78 | 0.07                | 13.68   | 2.31      |
| 4t       | 338.36 | 7.20   | 587.99 | 59.01  | 250.18 | 150.42 | 0.05                | 15.01   | 1.08      |
| 4u       | 355.43 | 9.93   | 623.03 | 0.00   | 135.54 | 359.86 | 0.09                | 14.76   | 2.99      |
| 4v       | 280.32 | 6.16   | 527.84 | 21.54  | 182.92 | 195.00 | 0.04                | 15.92   | 0.68      |
| 4w       | 269.30 | 8.40   | 496.90 | 29.44  | 156.53 | 182.55 | 0.09                | 14.62   | 0.73      |
| 4x       | 259.34 | 9.12   | 530.50 | 213.12 | 179.82 | 9.19   | 0.10                | 13.28   | 0.82      |
| 5a       | 320.34 | 10.65  | 563.77 | 0.00   | 241.69 | 193.71 | 0.12                | 16.15   | 0.68      |
| 5b       | 399.24 | 10.20  | 592.80 | 0.00   | 241.68 | 145.45 | 0.11                | 15.91   | 1.23      |
| 5c       | 365.34 | 10.98  | 604.12 | 0.00   | 339.08 | 136.66 | 0.12                | 17.28   | 0.02      |
